# Supplementary material for: Genetic and epigenetic mechanisms in the development of congenital heart diseases
Source: HighWire-hosted journal article supplement (doi:10.1136/wjps-2020-000196), 2021-04-29
Supplement: wjps-2020-000196supp001_data_supplement.pdf [file wjps-2020-000196supp001_data_supplement.pdf]

3/17/2021

RightsLink Printable License

**OXFORD UNIVERSITY PRESS LICENSE  
TERMS AND CONDITIONS**

Mar 17, 2021

---

---

This Agreement between Department of Genetic and Metabolic Diseases, The Children's Hospital, Zhejiang University School of Medicine -- Yue Wu ("You") and Oxford University Press ("Oxford University Press") consists of your license details and the terms and conditions provided by Oxford University Press and Copyright Clearance Center.

The publisher has provided special terms related to this request that can be found at the end of the Publisher's Terms and Conditions.

**All payments must be made in full to CCC. For payment instructions, please see information listed at the bottom of this form.**

License Number 5025060940256

License date Mar 09, 2021

Licensed Content Publisher Oxford University Press

Licensed Content Publication European Heart Journal

Licensed Content Title 2020 ESC Guidelines for the management of adult congenital heart disease: The Task Force for the management of adult congenital heart disease of the European Society of Cardiology (ESC)

Licensed Content Author Baumgartner, Helmut; De Backer, Julie

Licensed Content Date Aug 29, 2020

Type of Use Journal

3/17/2021

RightsLink Printable License

Requestor type Educational Institution/Non-commercial/ Not for-profit

Pharmaceutical support or sponsorship for this project No

Format Print and electronic

Portion Figure/table

Number of figures/tables 1

Will you be translating? No

Circulation/distribution 1

Title of new article Genetic and Epigenetic Mechanisms in the Development of Congenital Heart Diseases

Lead author Yue Wu

Title of targeted journal World Journal of Pediatric Surgery

Publisher BMJ

Expected publication date Mar 2021

Portions Table 4. Classification of congenital heart disease complexity

Requestor Location Department of Genetic and Metabolic Diseases, The Children's Hospital, Zhejiang University School of Medicine  
No 3333, Binsheng Road  
  
Hangzhou, 310052  
China

3/17/2021

RightsLink Printable License

Attn: Department of Genetic and Metabolic Diseases, The  
Children's Hospital, Zhejiang University School of Medicine

Publisher Tax ID      GB125506730

Billing Type            Credit Card

Credit card info        Master Card ending in 1493

Credit card expiration  05/2024

Total                    253.50 USD

Terms and Conditions

**STANDARD TERMS AND CONDITIONS FOR REPRODUCTION OF MATERIAL  
FROM AN OXFORD UNIVERSITY PRESS JOURNAL**

1. Use of the material is restricted to the type of use specified in your order details.
2. This permission covers the use of the material in the English language in the following territory: world. If you have requested additional permission to translate this material, the terms and conditions of this reuse will be set out in clause 12.
3. This permission is limited to the particular use authorized in (1) above and does not allow you to sanction its use elsewhere in any other format other than specified above, nor does it apply to quotations, images, artistic works etc that have been reproduced from other sources which may be part of the material to be used.
4. No alteration, omission or addition is made to the material without our written consent. Permission must be re-cleared with Oxford University Press if/when you decide to reprint.
5. The following credit line appears wherever the material is used: author, title, journal, year, volume, issue number, pagination, by permission of Oxford University Press or the sponsoring society if the journal is a society journal. Where a journal is being published on behalf of a learned society, the details of that society must be included in the credit line.
6. For the reproduction of a full article from an Oxford University Press journal for whatever purpose, the corresponding author of the material concerned should be informed of the proposed use. Contact details for the corresponding authors of all Oxford University Press journal contact can be found alongside either the abstract or full text of the article concerned, accessible from [www.oxfordjournals.org](http://www.oxfordjournals.org) Should there be a problem clearing these rights, please contact [journals.permissions@oup.com](mailto:journals.permissions@oup.com)
7. If the credit line or acknowledgement in our publication indicates that any of the figures, images or photos was reproduced, drawn or modified from an earlier source it will be

3/17/2021

RightsLink Printable License

necessary for you to clear this permission with the original publisher as well. If this permission has not been obtained, please note that this material cannot be included in your publication/photocopies.

8. While you may exercise the rights licensed immediately upon issuance of the license at the end of the licensing process for the transaction, provided that you have disclosed complete and accurate details of your proposed use, no license is finally effective unless and until full payment is received from you (either by Oxford University Press or by Copyright Clearance Center (CCC)) as provided in CCC's Billing and Payment terms and conditions. If full payment is not received on a timely basis, then any license preliminarily granted shall be deemed automatically revoked and shall be void as if never granted. Further, in the event that you breach any of these terms and conditions or any of CCC's Billing and Payment terms and conditions, the license is automatically revoked and shall be void as if never granted. Use of materials as described in a revoked license, as well as any use of the materials beyond the scope of an unrevoked license, may constitute copyright infringement and Oxford University Press reserves the right to take any and all action to protect its copyright in the materials.

9. This license is personal to you and may not be sublicensed, assigned or transferred by you to any other person without Oxford University Press's written permission.

10. Oxford University Press reserves all rights not specifically granted in the combination of (i) the license details provided by you and accepted in the course of this licensing transaction, (ii) these terms and conditions and (iii) CCC's Billing and Payment terms and conditions.

11. You hereby indemnify and agree to hold harmless Oxford University Press and CCC, and their respective officers, directors, employs and agents, from and against any and all claims arising out of your use of the licensed material other than as specifically authorized pursuant to this license.

12. Other Terms and Conditions: -Permission is granted on the basis that no pharmaceutical or medical product companies are directly involved or sponsoring this reuse. -Inclusion under a Creative Commons license or any other Open Access license allowing onward reuse is prohibited. -The credit line and any copyright/ disclaimer notices provided by OUP shall be included on the same page as the Material: Baumgartner H, De Backer J, Babu-Narayan SV, et al. 2020 ESC Guidelines for the management of adult congenital heart disease: The Task Force for the management of adult congenital heart disease of the European Society of Cardiology (ESC), European Heart Journal 2020; 1-83 doi:10.1093/eurheartj/ehaa554. Reprinted by permission of Oxford University Press on behalf of the European Society of Cardiology.

v1.4

**Questions? [customercare@copyright.com](mailto:customercare@copyright.com) or +1-855-239-3415 (toll free in the US) or +1-978-646-2777.**
